# Supplementary material for: Iron Restriction Alleviates Atherosclerosis in ApoE KO Mice: An iTRAQ Proteomic Analysis
Source: MDPI journal article supplement (doi:10.3390/ijms232415915), 2022-12-14
Supplement: s1 [file s1]

## **Supplemental Figure legends**

**Supplemental Figure S1. Effects of dietary iron restriction on body weight (A), food intake (B) and energy intake (C) in ApoE KO mice.** <sup>▲</sup> $P < 0.05$  HFD vs. ND; <sup>△</sup> $P < 0.05$  HFD+LI vs. ND.

## **Supplemental Figure S2. GO terms distribution**

GO enrichment analysis revealed the most relevant cellular component (CC) terms of proteins up- or down-regulated by HFD (versus ND) (A and B, respectively), and up- or down-regulated by HFD+LI (versus HFD) (C and D, respectively). Go analysis also displayed the most representative molecular function (MF) terms of proteins up- or down-regulated by HFD (versus ND) (E and F, respectively), and up- or down-regulated by HFD-LI (versus HFD) (G and H, respectively). Top 10 gene ontology clusters ( $p < 0.05$ ).

## **Supplemental Figure S3. Protein-protein interaction analysis of all aortic differentially expressed proteins.**

Interaction analysis correspondent to A: HFD versus ND, and B: HFD+LI versus HFD.

## **Supplemental Figure S4. Volcano plots**

Volcano plots correspondent to A: HFD versus ND, and B: HFD+LI versus HFD.

## **Supplemental Figure S5. Principal components analysis (PCA) plots**

2D-PCA plots correspondent to A: HFD versus ND, and C: HFD+LI versus HFD.

3D-PCA plots correspondent to B: HFD versus ND, and D: HFD+LI versus HFD.
