# Supplementary material for: Iron Restriction Alleviates Atherosclerosis in ApoE KO Mice: An iTRAQ Proteomic Analysis
Source: Int J Mol Sci. 2022 Dec 14;23(24):15915. doi: 10.3390/ijms232415915 (PMC9786058; doi:10.3390/ijms232415915)
Supplement: Supplementary file 1 [file ijms-23-15915-s001.zip]

Archive with 7 entries (7 files):
- Supplemental Figure legends.pdf
- Supplementary FigS1-Effects of dietary iron restriction on body weight (A), food intake (B) and energy intake (C) in ApoE KO mice..tif
- Supplementary FigS3-Protein-protein interaction analysis of all aortic differentially expressed proteins.tiff
- Supplementary FigS4-volcano plot.tif
- Supplementary FigureS5-PCA.tif
- Supplementary Table S1-The aortic proteomics analysis data.xlsx
- SupplementaryFigS2-Go terms distribution.tif
