# Supplementary material for: Iron Restriction Alleviates Atherosclerosis in ApoE KO Mice: An iTRAQ Proteomic Analysis
Source: Int J Mol Sci. 2022 Dec 14;23(24):15915. doi: 10.3390/ijms232415915 (PMC9786058; doi:10.3390/ijms232415915)
Supplement: Supplementary file 1 [file ijms-23-15915-s001.zip › Supplementary Table S1-The aortic proteomics analysis data.xlsx]

## Sheet: HFD vs. ND
Accession	Description	Uniprot	UNIPROT_URL	ave FC	P value
A0A075B5Q4	Protein Ighv5-12 (Fragment) GN=Ighv5-12			3.88487	0.00110366	up-regulated
A0A140T8M3	Protein Igkv8-30 (Fragment) GN=Igkv8-30			3.4695	0.000714577	up-regulated
P03987	Ig gamma-3 chain C region			2.83242	5.01925e-05	up-regulated
P01637	Ig kappa chain V-V region T1			2.24157	0.00026018	up-regulated
P16110	Galectin-3 GN=Lgals3			2.17907	2.17097e-05	up-regulated
P97401	Secreted frizzled-related protein 3 GN=Frzb			1.73966	0.000477432	up-regulated
O55226	Chondroadherin GN=Chad			1.69507	0.000344183	up-regulated
Q9R0G6	Cartilage oligomeric matrix protein GN=Comp			1.69038	0.00125812	up-regulated
P63082	V-type proton ATPase 16 kDa proteolipid subunit GN=Atp6v0c			1.65374	0.0241193	up-regulated
O35640	Annexin A8 GN=Anxa8			1.62145	0.000197406	up-regulated
A0A077S2U6	Lysozyme C-2 GN=Lyz2			1.60653	0.0224739	up-regulated
P29533	Vascular cell adhesion protein 1 GN=Vcam1			1.6015	3.5165e-05	up-regulated
Q07968	Coagulation factor XIII B chain GN=F13b			1.57949	0.000521647	up-regulated
A0A075B6A0	Ig mu chain C region (Fragment) GN=Ighm			1.54474	1.61705e-06	up-regulated
Q544V4	Vascular cell adhesion protein 1 GN=Vcam1			1.53836	0.00888195	up-regulated
Q9ERD7	Tubulin beta-3 chain GN=Tubb3			1.47073	0.00266436	up-regulated
P18242	Cathepsin D GN=Ctsd			1.46593	4.88357e-05	up-regulated
P98086	Complement C1q subcomponent subunit A GN=C1qa			1.45312	0.0148639	up-regulated
A0A140LIU4	Cytochrome c oxidase subunit 7A1, mitochondrial GN=Cox7a1			1.43759	0.0052039	up-regulated
P06797	Cathepsin L1 GN=Ctsl			1.42523	0.0023255	up-regulated
P35762	CD81 antigen GN=Cd81			1.42241	0.00398926	up-regulated
P33434	72 kDa type IV collagenase GN=Mmp2			1.41971	3.99237e-05	up-regulated
A0A0G2JDN5	Protein Igkv17-127 (Fragment) GN=Igkv17-127			1.41415	0.0121819	up-regulated
E9PV24	Fibrinogen alpha chain GN=Fga			1.41031	6.06712e-06	up-regulated
Q9QWK4	CD5 antigen-like GN=Cd5l			1.40694	0.00020464	up-regulated
Q3UER8	Fibrinogen gamma chain GN=Fgg			1.40312	1.60738e-05	up-regulated
P12787	Cytochrome c oxidase subunit 5A, mitochondrial GN=Cox5a			1.40226	0.000122555	up-regulated
Q9D023	Mitochondrial pyruvate carrier 2 GN=Mpc2			1.39881	2.14566e-05	up-regulated
Q80YQ1	Thrombospondin 1 GN=Thbs1			1.3904	3.00719e-05	up-regulated
P10605	Cathepsin B GN=Ctsb			1.38922	0.00121273	up-regulated
P06728	Apolipoprotein A-IV GN=Apoa4			1.38017	4.85341e-06	up-regulated
Q9R1Q6	Transmembrane protein 176B GN=Tmem176b			1.37544	0.0206258	up-regulated
Q9CQI6	Coactosin-like protein GN=Cotl1			1.37278	0.000213784	up-regulated
P34884	Macrophage migration inhibitory factor GN=Mif			1.37255	0.000130693	up-regulated
P12242	Mitochondrial brown fat uncoupling protein 1 GN=Ucp1			1.36723	5.03455e-05	up-regulated
F8WJ05	Inter-alpha-trypsin inhibitor heavy chain H1 GN=Itih1			1.36548	0.000538235	up-regulated
J3QPG5	Prosaposin GN=Psap			1.36195	0.000824683	up-regulated
Q9WV35	C->U-editing enzyme APOBEC-2 GN=Apobec2			1.35973	0.000607923	up-regulated
Q9CZB0	Succinate dehydrogenase cytochrome b560 subunit, mitochondrial GN=Sdhc			1.35851	0.0015701	up-regulated
P14106	Complement C1q subcomponent subunit B GN=C1qb			1.35747	0.000926955	up-regulated
P70303	CTP synthase 2 GN=Ctps2			1.35571	0.00431599	up-regulated
Q9CXV1	Succinate dehydrogenase [ubiquinone] cytochrome b small subunit, mitochondrial GN=Sdhd			1.34391	0.0136696	up-regulated
P61620	Protein transport protein Sec61 subunit alpha isoform 1 GN=Sec61a1			1.34104	0.00576509	up-regulated
P30412	Peptidyl-prolyl cis-trans isomerase C GN=Ppic			1.33972	0.00105721	up-regulated
Q80YX1	Tenascin GN=Tnc			1.3385	0.000112851	up-regulated
P17809	Solute carrier family 2, facilitated glucose transporter member 1 GN=Slc2a1			1.33502	0.0329476	up-regulated
Q3TGR2	Fibrinogen beta chain GN=Fgb			1.32927	2.54835e-05	up-regulated
Q99JY0	Trifunctional enzyme subunit beta, mitochondrial GN=Hadhb			1.3288	1.57765e-05	up-regulated
Q9D6M3	Mitochondrial glutamate carrier 1 GN=Slc25a22			1.32614	0.00298149	up-regulated
P00405	Cytochrome c oxidase subunit 2 GN=Mtco2			1.32524	0.00119022	up-regulated
P01887	Beta-2-microglobulin GN=B2m			1.32125	0.0266838	up-regulated
Q9Z2Z6	Mitochondrial carnitine/acylcarnitine carrier protein GN=Slc25a20			1.31943	0.0025912	up-regulated
Q642K5	40S ribosomal protein S30 GN=Fau			1.31896	0.000130511	up-regulated
P01631	Ig kappa chain V-II region 26-10			1.3162	0.022967	up-regulated
Q9CPP6	NADH dehydrogenase [ubiquinone] 1 alpha subcomplex subunit 5 GN=Ndufa5			1.31617	0.0117734	up-regulated
E9Q414	Apolipoprotein B-100 GN=Apob			1.31443	0.00409751	up-regulated
P09055	Integrin beta-1 GN=Itgb1			1.31363	0.0140788	up-regulated
P55096	ATP-binding cassette sub-family D member 3 GN=Abcd3			1.31343	0.00170939	up-regulated
Q6YI28	EP1 GN=2210407C18Rik			1.31242	0.0153383	up-regulated
Q62425	Cytochrome c oxidase subunit NDUFA4 GN=Ndufa4			1.31169	0.000349427	up-regulated
Q08879	Fibulin-1 GN=Fbln1			1.31157	0.00265768	up-regulated
Q549A5	Clusterin GN=Clu			1.31143	1.50974e-05	up-regulated
Q06318	Uteroglobin GN=Scgb1a1			1.30825	0.00205909	up-regulated
P18528	Ig heavy chain V region 6.96			1.30488	0.00552951	up-regulated
Q05816	Fatty acid-binding protein, epidermal GN=Fabp5			1.298	0.000222714	up-regulated
Q9ET22	Dipeptidyl peptidase 2 GN=Dpp7			1.29761	0.0481582	up-regulated
Q61233	Plastin-2 GN=Lcp1			1.296	0.00287197	up-regulated
P51667	Myosin regulatory light chain 2, ventricular/cardiac muscle isoform GN=Myl2			1.29138	0.00113133	up-regulated
Q5GQ64	Gamma-synuclein (Fragment) GN=Sncg			1.28874	0.011319	up-regulated
Q9JJI8	60S ribosomal protein L38 GN=Rpl38			1.28775	0.00192066	up-regulated
Q8BMS1	Trifunctional enzyme subunit alpha, mitochondrial GN=Hadha			1.28683	3.41679e-07	up-regulated
Q78XF5	Oligosaccharyltransferase complex subunit OSTC GN=Ostc			1.28642	0.00311843	up-regulated
E9Q8I0	Complement factor H GN=Cfh			1.28258	0.000823963	up-regulated
Q9JM76	Actin-related protein 2/3 complex subunit 3 GN=Arpc3			1.28124	0.00410375	up-regulated
Q4FJK0	2,4-dienoyl-CoA reductase, mitochondrial GN=Decr1			1.28005	4.54361e-05	up-regulated
P28658	Ataxin-10 GN=Atxn10			1.27807	0.00399808	up-regulated
Q9ERS2	NADH dehydrogenase [ubiquinone] 1 alpha subcomplex subunit 13 GN=Ndufa13			1.27798	0.00339046	up-regulated
P50544	Very long-chain specific acyl-CoA dehydrogenase, mitochondrial GN=Acadvl			1.27796	1.41927e-05	up-regulated
Q64449	C-type mannose receptor 2 GN=Mrc2			1.27629	0.00899853	up-regulated
A0A075B5P3	Protein Ighg2b (Fragment) GN=Ighg2b			1.2762	0.00044885	up-regulated
P02463	Collagen alpha-1(IV) chain GN=Col4a1			1.27432	0.012237	up-regulated
Q9DCJ5	NADH dehydrogenase [ubiquinone] 1 alpha subcomplex subunit 8 GN=Ndufa8			1.27301	0.00210565	up-regulated
P07091	Protein S100-A4 GN=S100a4			1.27268	0.000411814	up-regulated
P17047	Lysosome-associated membrane glycoprotein 2 GN=Lamp2			1.27252	0.00608499	up-regulated
P23492	Purine nucleoside phosphorylase GN=Pnp			1.27238	0.00300504	up-regulated
P13707	Glycerol-3-phosphate dehydrogenase [NAD(+)], cytoplasmic GN=Gpd1			1.2719	3.26807e-05	up-regulated
Q56A15	Cytochrome c GN=Cycs			1.27155	0.000842618	up-regulated
Q8R3P0	Aspartoacylase GN=Aspa			1.2687	0.00283966	up-regulated
B2RQQ1	MCG133649, isoform CRA_a GN=Myh6			1.26771	0.000267622	up-regulated
A0A0R4J083	Long-chain-specific acyl-CoA dehydrogenase, mitochondrial GN=Acadl			1.26764	0.00201129	up-regulated
Q546G4	Albumin 1 GN=Alb			1.26556	5.03433e-07	up-regulated
A2RSV8	Cytochrome c oxidase subunit 4 isoform 1, mitochondrial GN=Cox4i1			1.26479	0.000247755	up-regulated
Q921I1	Serotransferrin GN=Tf			1.26395	2.14194e-05	up-regulated
Q9DC70	NADH dehydrogenase [ubiquinone] iron-sulfur protein 7, mitochondrial GN=Ndufs7			1.26315	0.00214583	up-regulated
Q00623	Apolipoprotein A-I GN=Apoa1			1.26246	0.000154106	up-regulated
Q9CPQ3	Mitochondrial import receptor subunit TOM22 homolog GN=Tomm22			1.2616	0.0316759	up-regulated
P61961	Ubiquitin-fold modifier 1 GN=Ufm1			1.25864	0.00559931	up-regulated
J3QQ13	Troponin T, cardiac muscle GN=Tnnt2			1.25786	0.000805611	up-regulated
Q99LY9	NADH dehydrogenase [ubiquinone] iron-sulfur protein 5 GN=Ndufs5			1.2575	0.00375182	up-regulated
F8WHQ1	Tumor protein D52 GN=Tpd52			1.25713	0.0228447	up-regulated
P41241	Tyrosine-protein kinase CSK GN=Csk			1.25698	9.24001e-05	up-regulated
Q9D2V8	Major facilitator superfamily domain-containing protein 10 GN=Mfsd10			1.25598	0.0164042	up-regulated
Q6ZPF4	Formin-like protein 3 GN=Fmnl3			1.25558	0.0096213	up-regulated
Q91VB8	Alpha globin 1 GN=Hba-a1			1.25486	8.28966e-06	up-regulated
Q8R0X7	Sphingosine-1-phosphate lyase 1 GN=Sgpl1			1.25485	0.00739483	up-regulated
Q9D958	Signal peptidase complex subunit 1 GN=Spcs1			1.25482	0.00705515	up-regulated
Q9Z2I9	Succinyl-CoA ligase [ADP-forming] subunit beta, mitochondrial GN=Sucla2			1.25406	0.00053836	up-regulated
E9Q456	Tropomyosin alpha-1 chain GN=Tpm1			1.25355	0.0126856	up-regulated
Q91WD5	NADH dehydrogenase [ubiquinone] iron-sulfur protein 2, mitochondrial GN=Ndufs2			1.25313	0.000714707	up-regulated
Q8BWT1	3-ketoacyl-CoA thiolase, mitochondrial GN=Acaa2			1.25293	0.0023907	up-regulated
Q9QVP4	Myosin regulatory light chain 2, atrial isoform GN=Myl7			1.25207	0.0199953	up-regulated
Q9CY50	Translocon-associated protein subunit alpha GN=Ssr1			1.25109	0.00310116	up-regulated
Q91YT0	NADH dehydrogenase [ubiquinone] flavoprotein 1, mitochondrial GN=Ndufv1			1.25043	0.00036675	up-regulated
G3X981	Peripherin GN=Prph			1.25021	0.000548672	up-regulated
F6TQW2	Protein Ighg2c GN=Ighg2c			1.24776	0.000492332	up-regulated
Q9D2G2	Dihydrolipoyllysine-residue succinyltransferase component of 2-oxoglutarate dehydrogenase complex, mitochondrial GN=Dlst			1.24761	0.00185242	up-regulated
E9Q3T0	Protein Gm10073 GN=Gm10073			1.24545	8.52127e-06	up-regulated
Q99KI0	Aconitate hydratase, mitochondrial GN=Aco2			1.24461	3.4555e-06	up-regulated
Q80V26	Inositol monophosphatase 3 GN=Impad1			1.24436	0.00985086	up-regulated
Q921G7	Electron transfer flavoprotein-ubiquinone oxidoreductase, mitochondrial GN=Etfdh			1.24408	2.58131e-06	up-regulated
Q91W86	Vacuolar protein sorting-associated protein 11 homolog GN=Vps11			1.24125	0.0330443	up-regulated
P62814	V-type proton ATPase subunit B, brain isoform GN=Atp6v1b2			1.23875	0.0024781	up-regulated
G3X977	Inter-alpha trypsin inhibitor, heavy chain 2 GN=Itih2			1.23505	0.0144793	up-regulated
Q9CZ13	Cytochrome b-c1 complex subunit 1, mitochondrial GN=Uqcrc1			1.23452	2.81319e-05	up-regulated
P08249	Malate dehydrogenase, mitochondrial GN=Mdh2			1.2345	0.000384342	up-regulated
P29788	Vitronectin GN=Vtn			1.23432	0.00612191	up-regulated
P08607	C4b-binding protein GN=C4bpa			1.23428	0.000139411	up-regulated
P56391	Cytochrome c oxidase subunit 6B1 GN=Cox6b1			1.23374	0.0023275	up-regulated
Q61599	Rho GDP-dissociation inhibitor 2 GN=Arhgdib			1.23366	0.0338978	up-regulated
Q64332	Synapsin-2 GN=Syn2			1.23358	0.0217048	up-regulated
P11152	Lipoprotein lipase GN=Lpl			1.23257	0.048118	up-regulated
Q9D8W5	26S proteasome non-ATPase regulatory subunit 12 GN=Psmd12			1.2319	0.034626	up-regulated
Q80WG5	Volume-regulated anion channel subunit LRRC8A GN=Lrrc8a			1.23067	0.00462295	up-regulated
P52825	Carnitine O-palmitoyltransferase 2, mitochondrial GN=Cpt2			1.23046	0.000329402	up-regulated
Q91X72	Hemopexin GN=Hpx			1.23032	2.10933e-05	up-regulated
P01027	Complement C3 GN=C3			1.23012	0.000245766	up-regulated
P19123	Troponin C, slow skeletal and cardiac muscles GN=Tnnc1			1.22986	0.0303169	up-regulated
A0A087WR50	Fibronectin GN=Fn1			1.22972	1.67571e-05	up-regulated
Q4FJX9	Superoxide dismutase GN=Sod2			1.22876	0.00711986	up-regulated
Q9CR68	Cytochrome b-c1 complex subunit Rieske, mitochondrial GN=Uqcrfs1			1.2287	0.00142223	up-regulated
P62717	60S ribosomal protein L18a GN=Rpl18a			1.22532	0.000142901	up-regulated
P16330	2',3'-cyclic-nucleotide 3'-phosphodiesterase GN=Cnp			1.2252	0.011808	up-regulated
Q9D7J4	Cytochrome c oxidase protein 20 homolog GN=Cox20			1.22363	0.019591	up-regulated
F6WR04	Cathepsin S GN=Ctss			1.22335	0.0107928	up-regulated
P47934	Carnitine O-acetyltransferase GN=Crat			1.22322	0.00354483	up-regulated
P51150	Ras-related protein Rab-7a GN=Rab7a			1.22318	0.00450299	up-regulated
Q3TJ94	Prothrombin GN=F2			1.22294	0.00647851	up-regulated
P14115	60S ribosomal protein L27a GN=Rpl27a			1.2226	0.0159769	up-regulated
Q01339	Beta-2-glycoprotein 1 GN=Apoh			1.22182	0.000775719	up-regulated
Q924X2	Carnitine O-palmitoyltransferase 1, muscle isoform GN=Cpt1b			1.22048	0.00229894	up-regulated
P39039	Mannose-binding protein A GN=Mbl1			1.21925	0.00441086	up-regulated
Q91VA6	Polymerase delta-interacting protein 2 GN=Poldip2			1.21839	0.00476044	up-regulated
Q3UAI3	CD36 antigen, isoform CRA_a GN=Cd36			1.21777	0.00490795	up-regulated
P08121	Collagen alpha-1(III) chain GN=Col3a1			1.21637	0.000151911	up-regulated
P23953	Carboxylesterase 1C GN=Ces1c			1.21631	0.000388064	up-regulated
Q9D8T7	SRA stem-loop-interacting RNA-binding protein, mitochondrial GN=Slirp			1.21619	0.0180723	up-regulated
Q61425	Hydroxyacyl-coenzyme A dehydrogenase, mitochondrial GN=Hadh			1.21552	7.9996e-05	up-regulated
P45952	Medium-chain specific acyl-CoA dehydrogenase, mitochondrial GN=Acadm			1.21471	0.005297	up-regulated
Q545M7	Parvalbumin alpha GN=Pvalb			1.21381	6.68223e-05	up-regulated
P09103	Protein disulfide-isomerase GN=P4hb			1.2138	5.04277e-06	up-regulated
P39053	Dynamin-1 GN=Dnm1			1.21364	0.0155611	up-regulated
P0DN34	NADH dehydrogenase [ubiquinone] 1 beta subcomplex subunit 1 GN=Ndufb1			1.21181	0.0103065	up-regulated
Q8BP67	60S ribosomal protein L24 GN=Rpl24			1.2107	0.0341989	up-regulated
Q6IRU2	Tropomyosin alpha-4 chain GN=Tpm4			1.20885	0.000648047	up-regulated
O08749	Dihydrolipoyl dehydrogenase, mitochondrial GN=Dld			1.20875	0.0025297	up-regulated
Q8VDD5	Myosin-9 GN=Myh9			1.20703	6.49023e-05	up-regulated
Q9CQ54	NADH dehydrogenase [ubiquinone] 1 subunit C2 GN=Ndufc2			1.20663	0.0235075	up-regulated
Q8BH95	Enoyl-CoA hydratase, mitochondrial GN=Echs1			1.20557	0.00082443	up-regulated
Q9CZU6	Citrate synthase, mitochondrial GN=Cs			1.205	7.23115e-05	up-regulated
Q3UDM0	MOB kinase activator 1B GN=Mob1b			1.20468	0.00364436	up-regulated
Q9DCW4	Electron transfer flavoprotein subunit beta GN=Etfb			1.20407	6.50555e-05	up-regulated
A0A0A6YWR2	Ig gamma-1 chain C region secreted form (Fragment) GN=Ighg1			1.20381	0.0333859	up-regulated
Q9D6R2	Isocitrate dehydrogenase [NAD] subunit alpha, mitochondrial GN=Idh3a			1.20244	0.00107879	up-regulated
Q8R0Y8	Mitochondrial coenzyme A transporter SLC25A42 GN=Slc25a42			1.20228	0.00119991	up-regulated
Q3UP42	Protein S100-A9 GN=S100a9			1.20172	0.00518598	up-regulated
P14131	40S ribosomal protein S16 GN=Rps16			1.20169	0.00238854	up-regulated
P09470	Angiotensin-converting enzyme GN=Ace			1.20153	0.00273612	up-regulated
D4AFX7	Protein Dnajc13 GN=Dnajc13			1.20125	0.00369284	up-regulated
O08528	Hexokinase-2 GN=Hk2			1.20088	0.00085016	up-regulated
Q58E35	60S acidic ribosomal protein P1 GN=Rplp1			1.20033	0.0114204	up-regulated
Q91VC9	Growth hormone-inducible transmembrane protein GN=Ghitm			0.830474	0.00756029	down-regulated
Q8CG19	Latent-transforming growth factor beta-binding protein 1 GN=Ltbp1			0.811314	0.00036149	down-regulated
E9PWQ3	Protein Col6a3 GN=Col6a3			0.809066	3.25673e-07	down-regulated
Q64437	Alcohol dehydrogenase class 4 mu/sigma chain GN=Adh7			0.808623	0.00682266	down-regulated
F8WIT2	Annexin GN=Anxa6			0.806758	0.0378437	down-regulated
Q99JR5	Tubulointerstitial nephritis antigen-like GN=Tinagl1			0.804665	0.00041906	down-regulated
B2RQQ8	Collagen alpha-2(IV) chain GN=Col4a2			0.803124	0.00350169	down-regulated
Q02788	Collagen alpha-2(VI) chain GN=Col6a2			0.797696	6.36937e-05	down-regulated
Q04857	Collagen alpha-1(VI) chain GN=Col6a1			0.792879	2.29035e-06	down-regulated
P63037	DnaJ homolog subfamily A member 1 GN=Dnaja1			0.7915	0.000356199	down-regulated
E9Q0F0	Protein Krt78 GN=Krt78			0.784709	0.0382685	down-regulated
Q9R059	Four and a half LIM domains protein 3 GN=Fhl3			0.7815	0.00719855	down-regulated
P20065	Thymosin beta-4 GN=Tmsb4x			0.780041	0.0169811	down-regulated
B1AYL1	Protein Scn7a GN=Scn7a			0.778345	0.0402476	down-regulated
Q99P87	Resistin GN=Retn			0.73886	0.000528296	down-regulated
Q9QZZ6	Dermatopontin GN=Dpt			0.734364	0.000714553	down-regulated
A0A087WS16	Protein Col6a3 GN=Col6a3			0.730545	0.001857	down-regulated
P04104	Keratin, type II cytoskeletal 1 GN=Krt1			0.729008	0.000186885	down-regulated
G3UW82	MCG140437, isoform CRA_d GN=Myh2			0.71413	0.00133733	down-regulated
Q32P04	Keratin 5 GN=Krt5			0.707532	0.0162894	down-regulated
P62996	Transformer-2 protein homolog beta GN=Tra2b			0.679111	0.000103499	down-regulated
Q5SX40	Myosin-1 GN=Myh1			0.639834	2.93174e-06	down-regulated
Q3TX57	Collagen alpha-2(I) chain GN=Col1a2			0.454838	5.83313e-06	down-regulated
P11087	Collagen alpha-1(I) chain GN=Col1a1			0.451391	1.37559e-07	down-regulated

## Sheet: HFD+LI vs. HFD
Accession	Description	Uniprot	UNIPROT_URL	ave FC	P value
Q8VED5	Keratin, type II cytoskeletal 79 GN=Krt79			1.73396	0.000870259	up-regulated
Q3TTY5	Keratin, type II cytoskeletal 2 epidermal GN=Krt2			1.49079	0.0020313	up-regulated
Q06318	Uteroglobin GN=Scgb1a1			1.36517	2.25255e-05	up-regulated
P02535	Keratin, type I cytoskeletal 10 GN=Krt10			1.35484	9.8854e-05	up-regulated
Q6P8J7	Creatine kinase S-type, mitochondrial GN=Ckmt2			1.28522	0.000332962	up-regulated
B2RQQ1	MCG133649, isoform CRA_a GN=Myh6			1.27793	0.000616735	up-regulated
P19123	Troponin C, slow skeletal and cardiac muscles GN=Tnnc1			1.23251	0.0070849	up-regulated
Q9Z2I9	Succinyl-CoA ligase [ADP-forming] subunit beta, mitochondrial GN=Sucla2			1.22863	3.62557e-05	up-regulated
Q9DCJ5	NADH dehydrogenase [ubiquinone] 1 alpha subcomplex subunit 8 GN=Ndufa8			1.2195	0.00120885	up-regulated
E9Q450	Tropomyosin alpha-1 chain GN=Tpm1			1.21703	0.000974314	up-regulated
Q9CZB0	Succinate dehydrogenase cytochrome b560 subunit, mitochondrial GN=Sdhc			1.21504	0.00300051	up-regulated
Q497F1	Troponin I, cardiac 3 GN=Tnni3			1.20791	0.0215603	up-regulated
A0A140LIU4	Cytochrome c oxidase subunit 7A1, mitochondrial GN=Cox7a1			1.20468	0.00202805	up-regulated
Q7TQ48	Sarcalumenin GN=Srl			1.20085	0.00183269	up-regulated
P46412	Glutathione peroxidase 3 GN=Gpx3			0.831693	0.00093374	down-regulated
A2AQN4	Acetyl-coenzyme A synthetase, cytoplasmic GN=Acss2			0.831664	0.0073526	down-regulated
P02463	Collagen alpha-1(IV) chain GN=Col4a1			0.830327	0.00392382	down-regulated
G3X977	Inter-alpha trypsin inhibitor, heavy chain 2 GN=Itih2			0.828538	0.0121254	down-regulated
Q99LB4	Capping protein (Actin filament), gelsolin-like GN=Capg			0.827998	0.000617008	down-regulated
E9QJW9	Tryptase beta-2 GN=Tpsb2			0.826661	0.0158539	down-regulated
P11152	Lipoprotein lipase GN=Lpl			0.826595	0.0488594	down-regulated
P50608	Fibromodulin GN=Fmod			0.82591	0.000912911	down-regulated
P19096	Fatty acid synthase GN=Fasn			0.825552	3.9576e-05	down-regulated
P10711	Transcription elongation factor A protein 1 GN=Tcea1			0.823767	0.0271588	down-regulated
E9Q414	Apolipoprotein B-100 GN=Apob			0.82086	0.00480771	down-regulated
P01897	H-2 class I histocompatibility antigen, L-D alpha chain GN=H2-L			0.820435	0.0098099	down-regulated
P07091	Protein S100-A4 GN=S100a4			0.818638	0.000215438	down-regulated
P08121	Collagen alpha-1(III) chain GN=Col3a1			0.816998	0.00985132	down-regulated
F6WR04	Cathepsin S GN=Ctss			0.816022	0.0464096	down-regulated
Q9CY50	Translocon-associated protein subunit alpha GN=Ssr1			0.814718	0.00556815	down-regulated
Q6IRU2	Tropomyosin alpha-4 chain GN=Tpm4			0.814458	0.000146293	down-regulated
P28658	Ataxin-10 GN=Atxn10			0.814048	0.0121364	down-regulated
Q3U5Q7	UMP-CMP kinase 2, mitochondrial GN=Cmpk2			0.813989	0.00431501	down-regulated
P29788	Vitronectin GN=Vtn			0.813228	0.00476895	down-regulated
Q3TX57	Collagen alpha-2(I) chain GN=Col1a2			0.810399	0.000516582	down-regulated
P01027	Complement C3 GN=C3			0.807715	0.000190934	down-regulated
F8WJ05	Inter-alpha-trypsin inhibitor heavy chain H1 GN=Itih1			0.806751	0.00146605	down-regulated
P37889	Fibulin-2 GN=Fbln2			0.804776	0.000905678	down-regulated
Q8R0X7	Sphingosine-1-phosphate lyase 1 GN=Sgpl1			0.804082	0.00659334	down-regulated
P10605	Cathepsin B GN=Ctsb			0.802874	0.000667888	down-regulated
Q8R3P0	Aspartoacylase GN=Aspa			0.800269	0.00222283	down-regulated
Q9QVP4	Myosin regulatory light chain 2, atrial isoform GN=Myl7			0.800167	0.000104113	down-regulated
P06330	Ig heavy chain V region AC38 205.12			0.799095	0.00237341	down-regulated
Q99P87	Resistin GN=Retn			0.797924	0.000118372	down-regulated
P09055	Integrin beta-1 GN=Itgb1			0.797505	0.0293756	down-regulated
P06797	Cathepsin L1 GN=Ctsl			0.79648	0.0437022	down-regulated
F6TQW2	Protein Ighg2c GN=Ighg2c			0.794092	0.00060826	down-regulated
Q60847	Collagen alpha-1(XII) chain GN=Col12a1			0.792667	8.85087e-05	down-regulated
P30412	Peptidyl-prolyl cis-trans isomerase C GN=Ppic			0.786714	0.00116306	down-regulated
P21956	Lactadherin GN=Mfge8			0.782514	0.000113549	down-regulated
P18242	Cathepsin D GN=Ctsd			0.779958	6.22158e-05	down-regulated
Q3UFS5	Phospholipid transfer protein GN=Pltp			0.767578	0.00437008	down-regulated
P01631	Ig kappa chain V-II region 26-10			0.765728	0.0191369	down-regulated
A0A075B5N7	Protein Igkv6-13 GN=Igkv6-13			0.765449	0.00135321	down-regulated
E9Q8I0	Complement factor H GN=Cfh			0.763911	0.000273591	down-regulated
J3QPG5	Prosaposin GN=Psap			0.761083	0.000243883	down-regulated
Q9R0Q3	Transmembrane emp24 domain-containing protein 2 GN=Tmed2			0.759666	0.00377241	down-regulated
P16330	2',3'-cyclic-nucleotide 3'-phosphodiesterase GN=Cnp			0.758466	0.00505494	down-regulated
Q61233	Plastin-2 GN=Lcp1			0.758368	0.00251949	down-regulated
Q9CQI6	Coactosin-like protein GN=Cotl1			0.758011	0.000782324	down-regulated
Q07968	Coagulation factor XIII B chain GN=F13b			0.752829	0.00700898	down-regulated
A0A077S2U6	Lysozyme C-2 GN=Lyz2			0.749247	0.0360555	down-regulated
Q3U1N0	Coronin GN=Coro1a			0.748495	0.00417632	down-regulated
Q05816	Fatty acid-binding protein, epidermal GN=Fabp5			0.742998	0.000303535	down-regulated
Q08879	Fibulin-1 GN=Fbln1			0.739107	0.000517983	down-regulated
Q9ET22	Dipeptidyl peptidase 2 GN=Dpp7			0.729907	0.0237473	down-regulated
Q9JLM8	Serine/threonine-protein kinase DCLK1 GN=Dclk1			0.716501	0.021581	down-regulated
P14106	Complement C1q subcomponent subunit B GN=C1qb			0.707351	0.00181854	down-regulated
Q549A5	Clusterin GN=Clu			0.699637	1.16102e-05	down-regulated
Q9QWK4	CD5 antigen-like GN=Cd5l			0.694434	0.000215566	down-regulated
Q80YQ1	Thrombospondin 1 GN=Thbs1			0.694361	3.51617e-05	down-regulated
P01887	Beta-2-microglobulin GN=B2m			0.692031	0.0116509	down-regulated
O55226	Chondroadherin GN=Chad			0.689712	0.00069579	down-regulated
O35640	Annexin A8 GN=Anxa8			0.688028	0.000480076	down-regulated
Q80YX1	Tenascin GN=Tnc			0.682064	3.86883e-05	down-regulated
Q544V4	Vascular cell adhesion protein 1 GN=Vcam1			0.680945	0.0149997	down-regulated
P29533	Vascular cell adhesion protein 1 GN=Vcam1			0.673173	5.15345e-05	down-regulated
P39039	Mannose-binding protein A GN=Mbl1			0.672818	0.00359458	down-regulated
G3X981	Peripherin GN=Prph			0.670997	7.68942e-05	down-regulated
P19788	Matrix Gla protein GN=Mgp			0.66764	0.000206236	down-regulated
P98086	Complement C1q subcomponent subunit A GN=C1qa			0.662185	0.0081111	down-regulated
Q9ERD7	Tubulin beta-3 chain GN=Tubb3			0.661853	0.000678766	down-regulated
Q91XV3	Brain acid soluble protein 1 GN=Basp1			0.657917	0.0278743	down-regulated
A0A087WR50	Fibronectin GN=Fn1			0.65588	5.43137e-06	down-regulated
P63082	V-type proton ATPase 16 kDa proteolipid subunit GN=Atp6v0c			0.650661	0.0319544	down-regulated
A0A075B6A0	Ig mu chain C region (Fragment) GN=Ighm			0.642888	5.5897e-06	down-regulated
P97401	Secreted frizzled-related protein 3 GN=Frzb			0.628832	0.000378709	down-regulated
P33434	72 kDa type IV collagenase GN=Mmp2			0.580474	0.00184278	down-regulated
P16110	Galectin-3 GN=Lgals3			0.524905	1.94414e-05	down-regulated
P01637	Ig kappa chain V-V region T1			0.449115	0.000105342	down-regulated
P03987	Ig gamma-3 chain C region			0.330971	3.91781e-05	down-regulated
A0A140T8M3	Protein Igkv8-30 (Fragment) GN=Igkv8-30			0.284868	0.000795363	down-regulated
A0A075B5Q4	Protein Ighv5-12 (Fragment) GN=Ighv5-12			0.274681	0.00137879	down-regulated
